# Supplementary material for: The Anti-Multidrug-Resistant Acinetobacter baumannii Study on 1,3-diamino-7H-pyrrolo[3,2-f]quinazoline Compounds
Source: MDPI journal article supplement (doi:10.3390/molecules27238609), 2022-12-06
Supplement: s1 [file s1]

**Supplementary material**  
 Evaluation of *in vitro* antibacterial activities of OYYF-171, -172, and -175  
 Supplementary Table S1. MICs of OYYF-171, -172, -175 and reference antibiotics against 40 clinical isolates of A.  
*baumannii*

| Strain No.       | MIC (µg/mL) |     |     |      |             |                    |           |       |                                    |              |              |              |
|------------------|-------------|-----|-----|------|-------------|--------------------|-----------|-------|------------------------------------|--------------|--------------|--------------|
|                  | β-lactam    |     |     |      |             | Aminoglycosid<br>e | Quinolone |       | Folate<br>metabolis<br>m inhibitor | PQZ Compound |              |              |
|                  | AMP         | CAZ | AZT | MEM  | AMP<br>/SUL |                    | CIP       | LEV   |                                    | OYYF<br>-171 | OYYF<br>-172 | OYYF<br>-175 |
| CCPM(A)-P-102101 | >32         | >32 | 32  | >8   | >32         | >16                | >4        | 8     | >128                               | 8            | 8            | 8            |
| CCPM(A)-P-102102 | >32         | 4   | 32  | 0.5  | 4           | 0.5                | 0.125     | 0.125 | 16                                 | 0.25         | 0.25         | 0.5          |
| CCPM(A)-P-102103 | >32         | >32 | 64  | >8   | >32         | >16                | >4        | >8    | >128                               | 8            | 4            | 8            |
| CCPM(A)-P-102105 | >32         | 2   | 8   | 0.25 | 2           | 1                  | 0.125     | 0.06  | 16                                 | 0.5          | 0.5          | 0.5          |
| CCPM(A)-P-102106 | >32         | >32 | 64  | >8   | >32         | >16                | >4        | 8     | 128                                | 8            | 8            | 8            |
| CCPM(A)-P-102107 | >32         | >32 | 64  | >8   | >32         | >16                | >4        | 8     | 128                                | 8            | 8            | 8            |
| CCPM(A)-P-102108 | >32         | >32 | >64 | >8   | >32         | >16                | >4        | >8    | >128                               | 8            | 8            | 16           |
| CCPM(A)-P-102109 | >32         | >32 | 64  | >8   | >32         | 4                  | >4        | >8    | >128                               | 8            | 8            | 8            |
| CCPM(A)-P-102110 | >32         | 4   | 4   | 0.5  | 2           | >16                | 2         | 0.5   | 32                                 | 2            | 2            | 2            |
| CCPM(A)-P-102111 | >32         | >32 | 64  | >8   | >32         | >16                | >4        | >8    | >128                               | 8            | 8            | 8            |
| CCPM(A)-P-102112 | >32         | >32 | 64  | >8   | >32         | >16                | >4        | 8     | >128                               | 8            | 8            | 8            |
| CCPM(A)-P-102113 | >32         | 4   | 32  | 0.25 | 4           | 1                  | 0.25      | 0.06  | 16                                 | 0.25         | 0.25         | 0.5          |
| CCPM(A)-P-102114 | >32         | >32 | 64  | >8   | >32         | >16                | >4        | 8     | 128                                | 8            | 8            | 8            |
| CCPM(A)-P-102115 | >32         | >32 | 64  | >8   | >32         | >16                | >4        | >8    | >128                               | 8            | 8            | 8            |
| CCPM(A)-P-102116 | >32         | 2   | 16  | 0.25 | 4           | 0.5                | 0.125     | 0.125 | 8                                  | 0.5          | 0.5          | 1            |
| CCPM(A)-P-102117 | >32         | >32 | 64  | >8   | >32         | >16                | >4        | >8    | >128                               | 8            | 4            | 8            |
| CCPM(A)-P-102118 | >32         | >32 | 64  | >8   | >32         | >16                | >4        | >8    | >128                               | 8            | 8            | 16           |

|                  |     |     |     |       |     |     |       |       |      |      |      |      |
|------------------|-----|-----|-----|-------|-----|-----|-------|-------|------|------|------|------|
| CCPM(A)-P-102119 | >32 | 8   | 16  | 0.5   | 4   | 16  | 0.5   | 0.25  | 16   | 1    | 0.5  | 2    |
| CCPM(A)-P-102120 | >32 | 4   | 16  | 0.5   | 4   | 8   | 0.5   | 0.25  | 16   | 2    | 2    | 2    |
| CCPM(A)-P-102121 | >32 | >32 | 64  | >8    | >32 | >16 | >4    | 8     | >128 | 8    | 8    | 8    |
| CCPM(A)-P-102122 | >32 | 4   | 16  | 0.25  | 4   | 4   | 0.25  | 0.125 | 16   | 0.5  | 0.5  | 2    |
| CCPM(A)-P-102123 | >32 | 2   | 16  | 0.5   | 4   | 1   | 0.25  | 0.125 | 8    | 0.25 | 0.25 | 0.25 |
| CCPM(A)-P-102124 | >32 | 2   | 8   | 0.125 | 4   | 0.5 | 0.125 | 0.06  | 8    | 0.25 | 0.5  | 2    |
| CCPM(A)-P-102125 | >32 | 4   | 32  | 0.5   | 4   | 0.5 | 0.125 | 0.125 | 16   | 0.25 | 0.25 | 0.5  |
| CCPM(A)-P-102126 | >32 | 4   | 16  | 1     | 4   | 0.5 | 0.125 | 0.125 | 16   | 0.5  | 0.25 | 0.5  |
| CCPM(A)-P-102127 | >32 | >32 | 64  | >8    | >32 | >16 | >4    | >8    | 128  | 8    | 8    | 8    |
| CCPM(A)-P-102128 | >32 | >32 | 64  | >8    | >32 | >16 | >4    | 8     | >128 | 8    | 8    | 8    |
| CCPM(A)-P-102129 | >32 | >32 | >64 | >8    | >32 | >16 | >4    | >8    | >128 | 8    | 8    | 16   |
| CCPM(A)-P-102130 | >32 | >32 | 64  | >8    | >32 | >16 | >4    | >8    | >128 | 8    | 8    | 16   |
| CCPM(A)-P-102131 | >32 | >32 | >64 | >8    | >32 | >16 | >4    | >8    | >128 | 8    | 8    | 16   |
| CCPM(A)-P-102132 | >32 | >32 | 64  | >8    | >32 | >16 | >4    | >8    | 128  | 8    | 8    | 16   |
| CCPM(A)-P-102134 | >32 | >32 | >64 | >8    | >32 | >16 | >4    | >8    | >128 | 32   | 32   | >32  |
| CCPM(A)-P-102136 | >32 | 32  | 64  | 0.06  | >32 | >16 | >4    | >8    | >128 | 32   | 32   | >32  |
| CCPM(A)-P-102137 | >32 | >32 | 64  | >8    | >32 | >16 | >4    | 8     | >128 | 8    | 8    | 16   |
| CCPM(A)-P-102166 | >32 | >32 | >64 | >8    | >32 | >16 | >4    | 8     | 128  | 8    | 8    | 8    |
| CCPM(A)-P-102167 | >32 | >32 | >64 | >8    | >32 | 4   | >4    | >8    | >128 | 16   | 16   | 16   |
| CCPM(A)-P-102176 | >32 | >32 | 64  | >8    | >32 | >16 | >4    | 8     | 128  | 8    | 8    | 8    |
| CCPM(A)-P-102180 | >32 | >32 | 64  | >8    | >32 | >16 | >4    | 8     | 128  | 8    | 8    | 8    |
| CCPM(A)-P-102182 | >32 | 16  | 32  | >8    | >32 | >16 | >4    | >8    | >128 | 8    | 8    | 16   |

|                  |     |     |    |    |     |     |    |   |     |   |   |   |
|------------------|-----|-----|----|----|-----|-----|----|---|-----|---|---|---|
| CCPM(A)-P-102183 | >32 | >32 | 64 | >8 | >32 | >16 | >4 | 8 | 128 | 4 | 8 | 8 |
|------------------|-----|-----|----|----|-----|-----|----|---|-----|---|---|---|

AMP, Ampicillin; CAZ, Ceftazidime; AZT, Aztreonam; MEM, Meropenem; AMP/SUL, Ampicillin/Sulbactam; GEM, Gentamicin; CIP, Ciprofloxacin; LEV, Levofloxacin; TMP, Trimethoprim

Light gray shading: MDR isolates

Supplementary Table S2. Colony counts of *A.baumannii* ATCC 17978 exposed to OYYF-171 (Log<sub>10</sub> CFU/mL)

| Time (hour) | Concentration |         |       |       |       |       |        |
|-------------|---------------|---------|-------|-------|-------|-------|--------|
|             | 0             | 1/2×MIC | 1×MIC | 2×MIC | 4×MIC | 8×MIC | 16×MIC |
| 0           | 6.13          | 6.13    | 6.13  | 6.13  | 6.13  | 6.13  | 6.13   |
| 2           | 7.29          | 5.99    | 5.57  | 5.24  | 5.06  | 5.45  | 5.03   |
| 4           | 7.60          | 5.83    | 5.37  | 5.18  | 4.69  | 4.35  | 4.01   |
| 6           | 7.88          | 5.41    | 4.85  | 4.52  | 3.72  | 3.04  | 2.10   |
| 8           | 7.93          | 5.05    | 4.15  | 3.81  | 3.17  | 2.16  | 2.00   |
| 24          | 8.87          | 7.26    | 7.08  | 6.91  | 2.00  | 2.00  | 2.00   |

Supplementary Table S3. Colony counts of *A. baumannii* ATCC BAA-1791 exposed to OYYF-171 (Log<sub>10</sub> CFU/mL)

| Time (hour) | Concentration |         |       |       |       |       |        |
|-------------|---------------|---------|-------|-------|-------|-------|--------|
|             | 0             | 1/2×MIC | 1×MIC | 2×MIC | 4×MIC | 8×MIC | 16×MIC |
| 0           | 6.15          | 6.15    | 6.15  | 6.15  | 6.15  | 6.15  | 6.15   |
| 2           | 6.60          | 6.33    | 5.56  | 4.97  | 5.45  | 5.31  | 4.98   |
| 4           | 6.87          | 6.67    | 5.72  | 3.89  | 4.47  | 3.53  | 3.14   |
| 6           | 7.03          | 6.84    | 5.75  | 2.89  | 3.42  | 3.37  | 2.00   |
| 8           | 7.11          | 6.93    | 5.74  | 2.00  | 2.60  | 2.39  | 2.00   |
| 24          | 7.89          | 6.78    | 5.79  | 2.00  | 2.00  | 2.00  | 2.00   |

Supplementary Table S4. Colony counts of *A. baumannii* CCPM(A)-P-102101 exposed to OYYF-171 (Log<sub>10</sub> CFU/mL)

| Time (hour) | Concentration |         |       |       |       |       |        |
|-------------|---------------|---------|-------|-------|-------|-------|--------|
|             | 0             | 1/2×MIC | 1×MIC | 2×MIC | 4×MIC | 8×MIC | 16×MIC |
| 0           | 6.19          | 6.19    | 6.19  | 6.19  | 6.19  | 6.19  | 6.19   |
| 2           | 7.29          | 5.18    | 4.97  | 3.79  | 3.59  | 3.54  | 2.16   |
| 4           | 7.46          | 4.16    | 4.50  | 2.30  | 2.00  | 2.00  | 2.00   |
| 6           | 8.11          | 4.25    | 3.97  | 2.00  | 2.00  | 2.00  | 2.00   |
| 8           | 8.14          | 4.00    | 3.24  | 2.00  | 2.00  | 2.00  | 2.00   |
| 24          | 8.59          | 7.03    | 2.00  | 2.00  | 2.00  | 2.00  | 2.00   |

Supplementary Table S5. Colony counts of *A. baumannii* ATCC 17978 exposed to 1/4×MIC OYYF-171/SMZ (Log<sub>10</sub> CFU/mL)

| Time (hour) | Drug    |          |      |              |
|-------------|---------|----------|------|--------------|
|             | Control | OYYF-171 | SMZ  | OYYF-171+SMZ |
| 0           | 6.36    | 6.36     | 6.36 | 6.36         |
| 2           | 7.31    | 5.45     | 7.27 | 5.40         |

|    |      |      |      |      |
|----|------|------|------|------|
| 4  | 7.74 | 5.36 | 7.35 | 4.39 |
| 6  | 7.80 | 5.26 | 7.24 | 3.78 |
| 8  | 7.94 | 5.80 | 7.33 | 3.72 |
| 24 | 8.09 | 7.74 | 7.70 | 2.20 |

Supplementary Table S6. Colony counts of *A. baumannii* ATCC BAA-1791 exposed to 1/4×MIC OYYF-171/SMZ (Log<sub>10</sub> CFU/mL)

| Time (hour) | Drug    |          |      |              |
|-------------|---------|----------|------|--------------|
|             | Control | OYYF-171 | SMZ  | OYYF-171+SMZ |
| 0           | 6.15    | 6.15     | 6.15 | 6.15         |
| 2           | 6.60    | 6.65     | 5.70 | 5.35         |
| 4           | 6.87    | 6.96     | 6.96 | 4.98         |
| 6           | 7.03    | 6.94     | 6.89 | 4.16         |
| 8           | 7.11    | 7.13     | 6.94 | 3.81         |
| 24          | 7.89    | 7.45     | 7.28 | 2.95         |

Supplementary Table S7. Colony counts of *A. baumannii* CCPM(A)-P-102101 exposed to 1/4×MIC OYYF-171/SMZ (Log<sub>10</sub> CFU/mL)

| Time (hour) | Drug    |          |      |              |
|-------------|---------|----------|------|--------------|
|             | Control | OYYF-171 | SMZ  | OYYF-171+SMZ |
| 0           | 6.19    | 6.19     | 6.19 | 6.19         |
| 2           | 7.29    | 7.08     | 7.00 | 5.78         |
| 4           | 7.46    | 7.47     | 7.37 | 5.03         |
| 6           | 8.11    | 7.67     | 7.29 | 4.68         |
| 8           | 8.14    | 7.94     | 7.39 | 4.30         |
| 24          | 8.59    | 8.00     | 8.37 | 2.20         |
